# Supplementary material
Source: PubMed Central journal article supplement (PMC8592288)
Supplement: NIHMS1748220-supplement-Supplementary_Material.pdf [file NIHMS1748220-supplement-Supplementary_Material.pdf]

# Supplementary Material

## Biological Evaluation and Synthesis of Calcitroic Acid

Olivia B. Yu<sup>a</sup>, Daniel A. Webb<sup>a</sup>, Elliot S. Di Milo<sup>a</sup>, Tania R. Mutchie<sup>a</sup>, Kelly A. Teske<sup>a</sup>, Taosheng Chen<sup>b</sup>, Wenwei Lin<sup>b</sup>, Carole Peluso-Iltis<sup>c</sup>, Natacha Rochel<sup>c</sup>, Moritz Helmstädter<sup>d</sup>, Daniel Merk<sup>d</sup> and Leggy A. Arnold<sup>a,\*</sup>

<sup>a</sup>Department of Chemistry and Biochemistry and Milwaukee Institute for Drug Discovery (MIDD), University of Wisconsin, 3210 N Cramer Street, Milwaukee, WI, 53211, USA.

<sup>b</sup>Department of Chemical Biology and Therapeutics, 262 Danny Thomas Place, St. Jude Children's Research Hospital, Memphis, TN 38105, USA.

<sup>c</sup>Institut de Génétique et de Biologie Moléculaire et Cellulaire (IGBMC), INSERM, U1258/CNRS, UMR 7104, University of Strasbourg, 67404 Illkirch, France.

<sup>d</sup>Institute of Pharmaceutical Chemistry, Goethe University Frankfurt, Max-von-Laue-Strasse 9, D-60438 Frankfurt, Germany.

### Contents

|                                                                                       |   |
|---------------------------------------------------------------------------------------|---|
| CTA-ME (5) <sup>1</sup> H NMR.....                                                    | 2 |
| CTA (6) <sup>1</sup> H NMR .....                                                      | 3 |
| Supplementary Table: Data collection and refinement statistics for zVDR-LBD-CTA ..... | 4 |

# CTA-ME (5) <sup>1</sup>H NMR

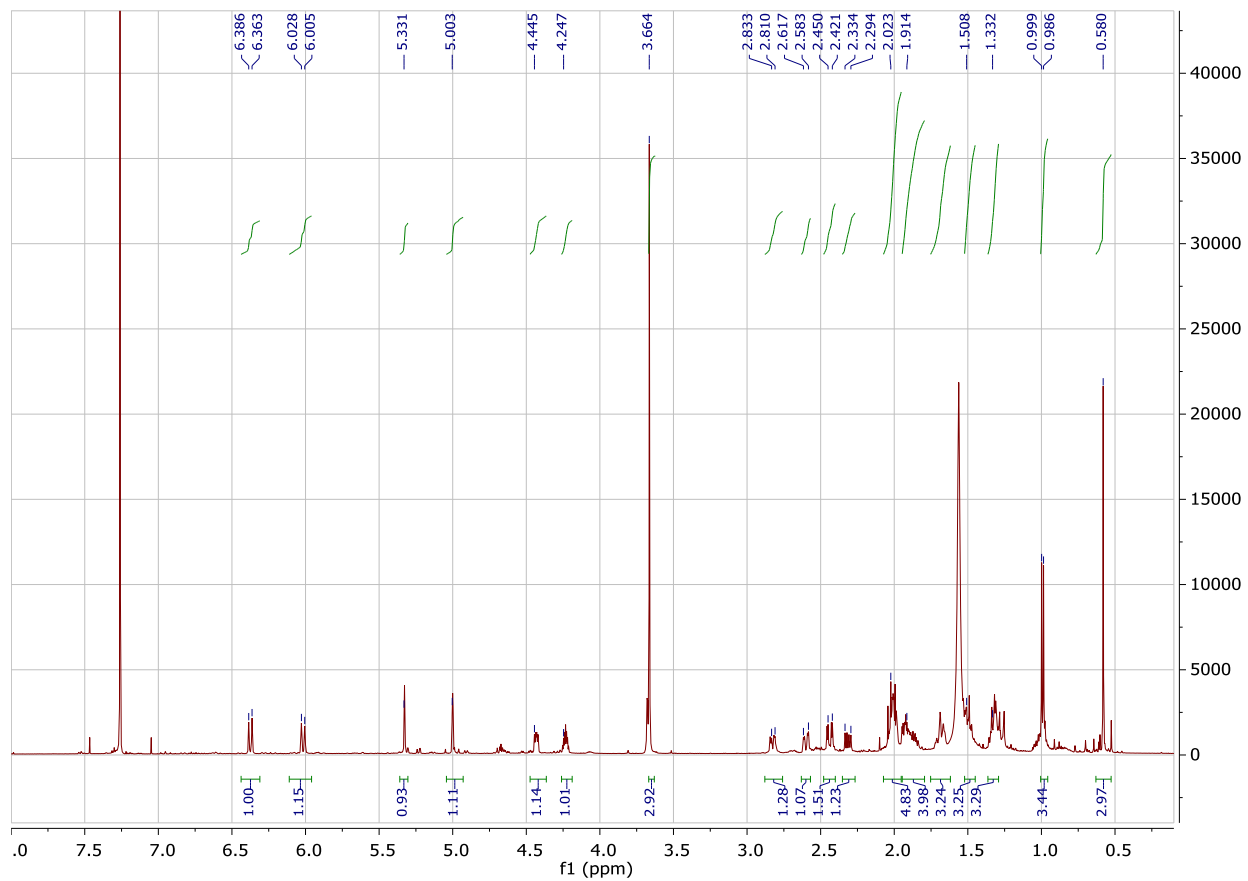

# CTA (6) <sup>1</sup>H NMR

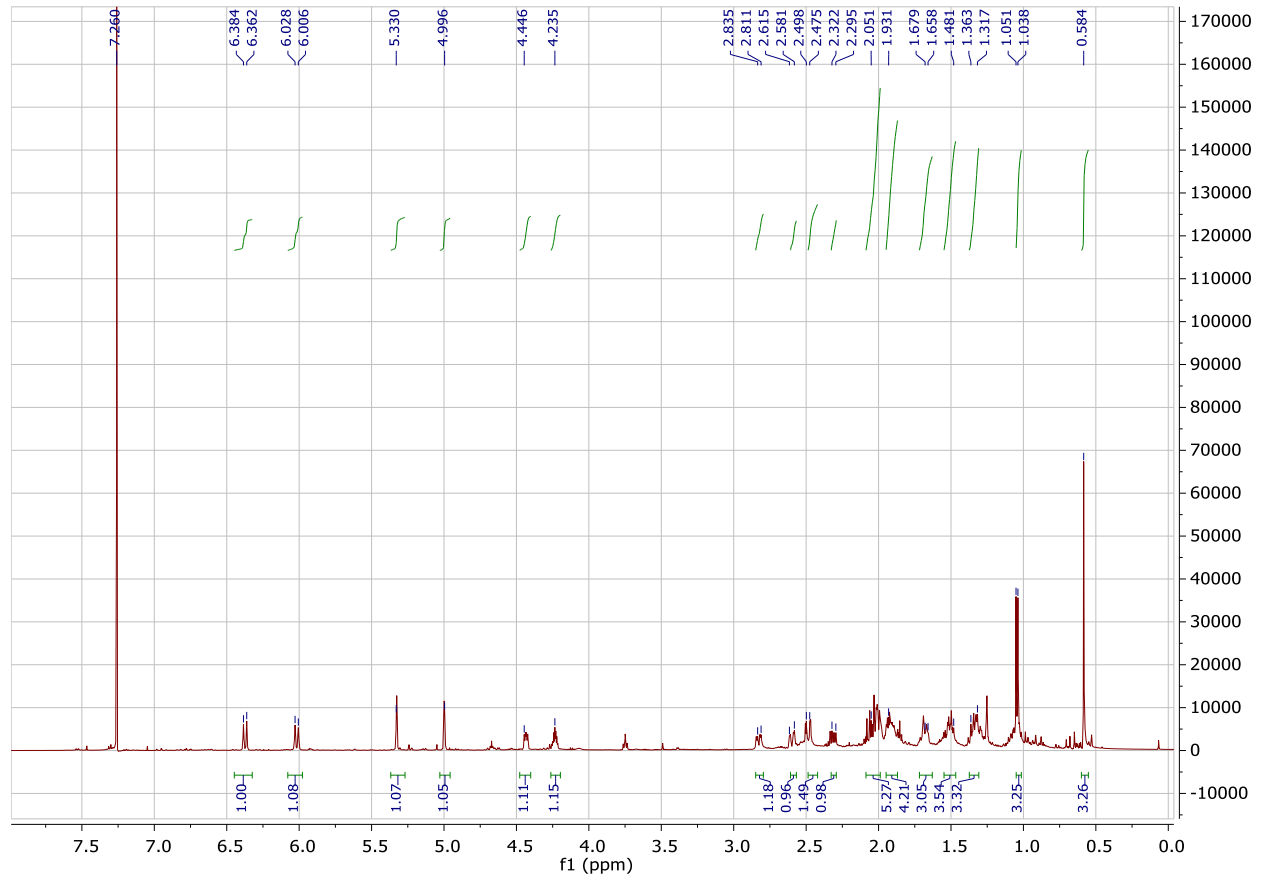

**Supplementary Table: Data collection and refinement statistics for zVDR-LBD-CTA**

|                                                  | <b>zVDR LBD / CTA</b>                              |
|--------------------------------------------------|----------------------------------------------------|
| <b>Data Collection and processing statistics</b> |                                                    |
| Beamline                                         | Proxima 2A                                         |
| Wavelength (Å)                                   | 0.98                                               |
| Space group                                      | P6 <sub>5</sub> 22                                 |
| Unit cell parameters (Å, °)                      | a=b=65.74 c=264.82, $\alpha=\beta=90$ $\gamma=120$ |
| Resolution (Å)                                   | 28.47-2.39                                         |
| Total reflections                                | 352720                                             |
| Unique reflections                               | 14257                                              |
| Multiplicity                                     | 24.7                                               |
| I/ $\sigma$ (I)                                  | 12.26                                              |
| Completeness                                     | 99.22                                              |
| Wilson B-factor                                  | 71.49                                              |
| CC <sub>1/2</sub>                                | 0.999                                              |
| <b>Refinement</b>                                |                                                    |
| Reflections used in refinement                   | 14189                                              |
| Reflections used for R-free                      | 710                                                |
| R <sub>work</sub> / R <sub>free</sub>            | 0.24 / 0.28                                        |
| R.M.S.D. Bond lengths (Å)                        | 0.004                                              |
| R.M.S.D. Bond angles (°)                         | 0.64                                               |
| Ramachandran                                     |                                                    |
| Outliers (%)                                     | 0                                                  |
| Favored (%)                                      | 95.85                                              |
| Mean B factor (Å <sup>2</sup> )                  |                                                    |
| Protein                                          | 88.08                                              |
| Ligand                                           | 77.26                                              |
